# Supplementary material for: A thermal-induced electric current from a gold electrode/porous silicon device
Source: Royal Society of Chemistry journal article supplement (doi:10.1039/c7ra05474b), 2017-01-01
Supplement: c7ra05474b1.pdf [file c7ra05474b1.pdf]

## Supporting information

### Thermal-induced electric current from gold electrode/porous silicon device

Cheng-Yin Huang, Chin-Kai Chang, Kai-Shin Wen and Vincent K. S. Hsiao\*

*Department of Applied Materials and Optoelectronic Engineering, National Chi Nan University, Nantou, Taiwan 54561. Email: kshsiao@ncnu.edu.tw*

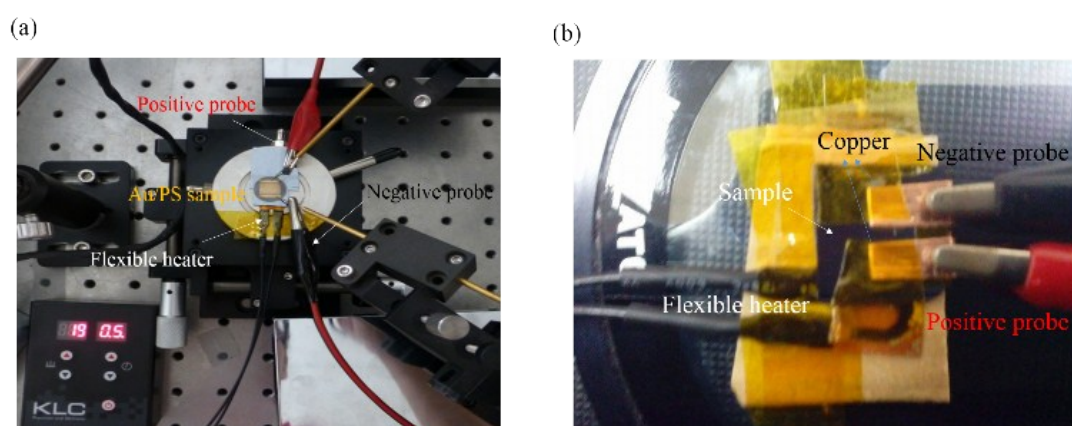

Figure S1 Image of measurement setup for characterizing the current from the Au/PS device using (a) comb-electrode and (b) square-shape electrode. One Au electrode connected to the negative probe from the current meter was heated by a flexible heater; the other Au electrode was connected to positive probe to measure the electrons flowing to negative to positive probe (positive current) from the current meter. Heating positive probe generated negative current measured from current meter.
